1 **Comparative analysis of IgG Responses to recombinant Q $\beta$  phage displayed MSP3 and**  
2 **UB05 in Dual HIV-malaria infected adults living in areas differing in Malaria transmission**  
3 **intensities.**

4 **Authors:**

- 5 Abel Lissom<sup>3,7</sup>, Herve F. Ouambo<sup>3,14</sup>, Rosette Megnekou<sup>5,7</sup>, Malachy I. Okeke<sup>19</sup>, Loveline N.  
6 Ngu<sup>3,4</sup>, Palmer M. Netongo<sup>4,5</sup>, Apeh A. Ngoh<sup>3,8</sup>, Carrie A. Sanders<sup>1</sup>, Swapnil Bawage<sup>1,2</sup>, Thibau  
7 F. Tchouangueu<sup>3,17</sup>, Colince J. Tchadji<sup>3,7</sup>, Arinze S. Okoli<sup>10</sup>, Ghislain D. Njambe Priso<sup>3,7</sup>,  
8 Rosario Garcia<sup>15</sup>, Anna Gutiérrez<sup>15</sup>, George O. Chukwuma<sup>3,12</sup>, Charles O. Esimone<sup>9</sup>, Eric A.  
9 Achidi<sup>14</sup>, Wilfred F. Mbacham<sup>4,5,6</sup>, Lazare Kaptue<sup>11</sup>, Rose FG Leke<sup>5</sup>, Chae Gyu Park<sup>16,18</sup>, Alain  
10 Bopda Waffo<sup>1,2,13\*</sup>, Godwin W. Nchinda<sup>3\*</sup>
- 11 Abel Lissom ([lissomabel@yahoo.fr](mailto:lissomabel@yahoo.fr))<sup>3,7</sup>
- 12 Herve F. Ouambo ([herve003@yahoo.fr](mailto:herve003@yahoo.fr))<sup>3,14</sup>
- 13 Rosette Megnekou ([megnekor@yahoo.fr](mailto:megnekor@yahoo.fr))<sup>5,7</sup>
- 14 Malachy I. Okeke ([malachy.okeke@uit.no](mailto:malachy.okeke@uit.no))<sup>19</sup>
- 15 Loveline N. NGU ([loveline\\_ngu@yahoo.com](mailto:loveline_ngu@yahoo.com))<sup>3,4</sup>
- 16 Palmer M. Netongo ([masumben@gmail.com](mailto:masumben@gmail.com))<sup>4,5</sup>
- 17 Apeh A. Ngoh ([apeh.alfredngoh@yahoo.com](mailto:apeh.alfredngoh@yahoo.com))<sup>3,8</sup>
- 18 Carrie A. Sanders ([carriec1c3@gmail.com](mailto:carriec1c3@gmail.com))<sup>1</sup>
- 19 Swapnil Bawage ([swapnilsbawage@gmail.com](mailto:swapnilsbawage@gmail.com))<sup>1,2</sup>
- 20 Thibau F. Tchouangueu ([tthibauflaurant@yahoo.com](mailto:tthibauflaurant@yahoo.com))<sup>3,17</sup>

- 21 Colince J. Tchadji ([jctchadji@yahoo.fr](mailto:jctchadji@yahoo.fr))<sup>3,7</sup>
- 22 Arinze S. Okoli ([arinze.s.okoli@uit.no](mailto:arinze.s.okoli@uit.no))<sup>10</sup>
- 23 Ghislain D. Njambe Priso ([ghislaindonald2@yahoo.fr](mailto:ghislaindonald2@yahoo.fr))<sup>3,7</sup>
- 24 Rosario Garcia ([rosi.acibikop@gmail.com](mailto:rosi.acibikop@gmail.com))<sup>15</sup>
- 25 Anna Gutiérrez ([anagutiaci@yahoo.es](mailto:anagutiaci@yahoo.es))<sup>15</sup>
- 26 George O. Chukwuma ([go.chukwuma@unizik.edu.ng](mailto:go.chukwuma@unizik.edu.ng))<sup>3,12</sup>
- 27 Charles O. Esimone ([co.esimone@unizik.edu.ng](mailto:co.esimone@unizik.edu.ng))<sup>9</sup>
- 28 Eric A. Achidi ([achidi\\_e@yahoo.com](mailto:achidi_e@yahoo.com))<sup>14</sup>
- 29 Wilfred Mbacham ([wfmbacham@yahoo.com](mailto:wfmbacham@yahoo.com))<sup>4,5,6</sup>
- 30 Lazare Kaptue ([prkaptue@yahoo.fr](mailto:prkaptue@yahoo.fr))<sup>11</sup>
- 31 Rose FG Leke ([roseleke@yahoo.com](mailto:roseleke@yahoo.com))<sup>5</sup>
- 32 Chae Gyu Park ([chaegy@yuhs.ac](mailto:chaegy@yuhs.ac))<sup>16,18</sup>
- 33 Alain Bopda Waffo ([abopdawaffo@alasu.edu](mailto:abopdawaffo@alasu.edu))<sup>1,2,13</sup>
- 34 Godwin W. Nchinda ([nsehleh@gmail.com](mailto:nsehleh@gmail.com))<sup>3</sup>

35 **Affiliation**

36 <sup>1</sup>Department of Biological Sciences/College STEM 1627 Hall Street Montgomery, AL 36101

37 <sup>2</sup>Center for Nano Biotechnology Research, 1627 Harris Way Montgomery, AL 36104

38 <sup>3</sup>Laboratory of Vaccinology/Biobanking, CIRCB Cameroon

- 39 <sup>4</sup>Department of Biochemistry, University of Yaoundé I, Cameroon
- 40 <sup>5</sup>The Biotechnology Center, University of Yaoundé I, Cameroon
- 41 <sup>6</sup>The Department of Biochemistry and Physiology, Faculty of Medicine, University of Yaoundé  
42 I, Cameroon
- 43 <sup>7</sup>Department of Animal Biology and Physiology, University of Yaoundé I
- 44 <sup>8</sup>Department of Biomedical Sciences, University of Dschang, Cameroon
- 45 <sup>9</sup>Department of Pharmaceutical Microbiology & Biotechnology, Nnamdi Azikiwe University  
46 Awka, Nigeria
- 47 <sup>10</sup>GenØk - Centre for Biosafety, Tromsø, Norway
- 48 <sup>11</sup>Université des Montagnes, Bangangté, Cameroon
- 49 <sup>12</sup>Department of Medical Lab Sciences; Nnamdi Azikiwe University, Awka Nigeria
- 50 <sup>13</sup>Microbiology Program, Department of Biological Sciences, College of Science, Technology,  
51 Engineering and Mathematics, Alabama State University, Montgomery, AL, USA
- 52 <sup>14</sup>Department of Medical Laboratory Sciences, University of Buea, Cameroon
- 53 <sup>15</sup>Centre de Santé Catholique de Bikop, Cameroon
- 54 <sup>16</sup>Laboratory of Immunology, Brain Korea 21 PLUS Project for Medical Science, Severance  
55 Biomedical Science Institute, Yonsei University College of Medicine, Seoul 03722, Republic of  
56 Korea
- 57 <sup>17</sup>Department of Biochemistry, University of Dschang, Cameroon
- 58 <sup>18</sup>Laboratory of Cellular Physiology and Immunology and Chris Browne Center for Immunology  
59 and Immune Diseases, Rockefeller University, New York, NY 10065, USA
- 60 <sup>19</sup>Molecular Inflammation Research Group, Department of Medical Biology, Faculty of Health  
61 Sciences, UiT The Arctic University of Norway, N-9037 Tromsø, Norway

62 \* **Corresponding author:** Godwin W. Nchinda and Alain Bopda Waffo,

63 **Fax:** (237) 222315456 or (001) 334229 1007,

64 **Phone number:** (237) 676523909 or (001) 334 229 8396,

65 **Email address:** [nsehleh@gmail.com](mailto:nsehleh@gmail.com) or [abopdawaffo@alasu.edu](mailto:abopdawaffo@alasu.edu)

66 **Abstract**

67 Immunoglobulin G specific responses against *Plasmodium falciparum* merozoite antigens such  
68 as the merozoite surface protein 3 (MSP3) and UB05 are known to play critical roles in  
69 parasitemia control and protection from symptomatic illness. However when there is intense  
70 perennial malaria transmission coupled with concurrent infection with the human  
71 immunodeficiency virus type 1 (HIV), knowledge of IgG antibody response profiles is limited.

72 In this study we assessed the impact of dual HIV-Malaria infections on IgG subclass responses to  
73 MSP3 (Q $\beta$ MSP3) and UB05 (Q $\beta$ UB05) in individuals living in two areas of Cameroon differing  
74 in transmission intensity. We observed differences in antigen specific IgG and IgG subclass  
75 responses which was dependent upon the antigen type, malaria transmission intensity, HIV  
76 infection, malaria infection and dual HIV-malaria infections. Individuals living in high malaria  
77 transmission areas irrespective of HIV or malaria status had significantly higher IgG responses to  
78 both antigens (P=0.0001 for Q $\beta$ MSP3, P=0.0001 for Q $\beta$ UB05) than their counterpart from low  
79 transmission areas. When dual HIV-Malaria infection is considered significantly higher  
80 Q $\beta$ MSP3 specific IgG1 (P=0.0001) and IgG3 (P=0.04) responses in double negative individuals  
81 was associated with protection against malaria in low transmission areas. Superior Q $\beta$ UBO5  
82 specific IgG1 responses (P=0.0001) in double negative individuals were associated with  
83 protection in high transmission areas in contrast to significantly higher IgG3 responses to

84 Q $\beta$ UB05 (P=0.0001) which were more relevant to protection in low malaria transmission areas  
85 in the same population. Thus, understanding immune responses to Q $\beta$ UB05 and Q $\beta$ MSP3 could  
86 facilitate the development of immunotherapeutic strategies suitable for areas differing in malaria  
87 transmission intensity.

88 **Key words:** Dual HIV-Malaria, Q $\beta$ UB05, Q $\beta$ MSP3, IgG subclass, antibodies, natural immunity

## 89 **Introduction**

90 In Cameroon like in most sub Saharan African countries people living in low or high malaria  
91 transmission areas are exposed to different frequencies of *Plasmodium falciparum*. Within such  
92 regions long term inhabitants suffer repeated exposure to varying strains of malaria parasite  
93 during the course of several years eventually developing protection from infection and  
94 symptomatic illness irrespective of malaria transmission intensity (1). A critical component of  
95 this naturally acquired immunity is *Plasmodium falciparum* induced IgG and IgG subclass  
96 antibody responses targeting a number of parasite derived antigens. However little is known  
97 about the IgG antibody subclass profile that mediates protective immunity to malaria in both low  
98 and high malaria transmission areas. Also, when there is concurrent infection with the human  
99 Immunodeficiency virus type 1(HIV), knowledge of the precise nature of parasite antigen  
100 directed IgG subclass antibody responses functional in the afflicted individuals is limited. Given  
101 that HIV infection depletes the immune system there is need to understand the role of promising  
102 malaria target antigens and the profile of IgG subclass responses driving protective immunity to  
103 malaria in both low and high transmission areas.

104 Antibodies to several asexual blood stage antigens including apical membrane antigen 1 (AMA-  
105 1), erythrocyte binding antigen (EBA-175), the merozoite surface proteins (MSPs), reticulocyte-  
106 binding protein homologue (Rh5), Glutamate-rich protein (GLURP), UB05 and

107 circumsporozoite protein (CSP) have been demonstrated to be an essential component of  
108 naturally acquired immunity reducing parasite multiplication thereby preventing infection and  
109 clinical disease in long term inhabitants of endemic regions (2-8). In this regards high levels of  
110 IgG antibody subclass responses and diversity of the target antigens have been associated with  
111 naturally acquired immunity to malaria (6-9). However, due to inherent polymorphism in the  
112 asexual blood stage antigens (10) some elements of antibody-mediated immunity to *P.*  
113 *falciparum* have been reported to be strain specific (11, 12) thereby limiting their utility as global  
114 malaria vaccine candidates.

115 In low and high transmission areas the attainment of clinical immunity against malaria or  
116 protection from infection is largely dependent upon continuous exposure to multiple parasite  
117 variants (13) leading to an accumulation of a broad range of antibody specificities responsible for  
118 the naturally acquired immunity. In areas differing in transmission intensities it is uncertain  
119 which IgG subclass respond profiles are relevant to naturally acquired immunity. The scenario  
120 becomes even more challenging when there is attendant co-infection with HIV which  
121 dysregulates antibody responses and depletes the immune system.

122 In this study we have determined in low and high malaria transmission areas the impact of dual  
123 HIV-malaria infection on IgG subclass responses to two conserved *P. falciparum* derived  
124 asexual blood stage antigens displayed separately upon a recombinant RNA coliphage Q $\beta$  as  
125 previously described by our group (14, 15). The recombinant phage Q $\beta$ MSP3 displays the  
126 conserved C-terminal 88 aa of the merozoite surface protein 3 (16, 17) whilst Q $\beta$ UB05 bears the  
127 previously described malaria antigen UBO5 (18). Surface display upon the recombinant RNA  
128 coliphage Q $\beta$  as previously demonstrated by our group improves the antigenicity of inserted  
129 antigens (14, 15).

130 Antibodies specific to *Plasmodium falciparum* MSP3 are known to mediate parasite killing in  
131 association with monocytes in a process referred to as (19-21) antibody-dependent cellular  
132 inhibition (ADCI). MSP3 specific antibodies therefore contribute in preventing symptomatic  
133 disease through the inhibition of blood parasite invasion cycles ultimately leading to a reduction  
134 in parasite burden and episodes of malaria (22, 23). A number of malaria vaccine candidates  
135 incorporating this highly conserved C-terminal end of MSP3 have been assessed in clinical trials  
136 with promising outcomes (19, 24-26). On other hand UB05 specific antibodies have also been  
137 associated with protection in exposed populations (18). We compared between dual HIV-malaria  
138 infected and double negative individuals the IgG subclass responses specific to the malaria  
139 vaccine antigens in both low and high malaria transmission area of Cameroon. Our study can  
140 facilitate the identification of surrogate markers of malaria immunity useful in the design of  
141 novel highly efficacious vaccines and the development of immunotherapeutic strategies to  
142 enhance immunity to malaria in people living in areas differing in transmission intensity.

## 143 **Materials and Methods**

### 144 **Study site**

145 The study was carried out in two areas of Cameroon (Yaounde and Bikop) differing in malaria  
146 transmission intensity. As the Capital city of Cameroon Yaounde (3°52'N11°31'E) is a multi-  
147 ethnic city situated at an average elevation of 750 m. Bikop on the other hand is a remote rural  
148 area located 48 KM away from Yaounde with year round intense malaria transmission. Both  
149 Yaoundé and Bikop are holendemic for malaria however with differing transmission intensity.  
150 This is mainly because unlike Yaounde, Bikop is located in the heart of the rain forest with a  
151 large number of mosquito breedings sites and poorly constructed houses favoring sustained high  
152 malaria transmission. The temperature in both areas is around 23.7°C with a similar average

153 annual rain fall of 1643 mm. There also have similar rainy (March to June, September to  
154 November) and dry seasons (December to February, July–August) (27).

### 155 **Ethical clearance**

156 This study received ethical approval from the Cameroon National Ethics Committee for Human  
157 Health Research (Reference numbers 2015/03/561/CE/CNERSH/SP and  
158 2018/01969/CE/CNERSH/SP) and the CIRCB institutional review board (protocol number 14-  
159 11). All participants provided written informed consent. Data were processed using specific  
160 identifiers for privacy and confidentiality purposes. Clinical data generated during the course of  
161 this study was provided free of charge to all participants.

### 162 **Study design**

163 This was a cross-sectional study which enrolled HIV-1 infected and non-infected people who  
164 were 21 years or older. Participants with other infection (including microfilaria, dengue, TB, and  
165 hepatitis B and C) and pregnant women were excluded from the study. All participants were  
166 members of the CIRCB AFRODEC cohort (28-30)

### 167 **Study area**

168 This study was carried out in two areas of Cameroon (Yaounde and Bikop) differing in malaria  
169 transmission intensity. As the Capital city of Cameroon Yaounde (3°52'N11°31'E) is a multi-  
170 ethnicity situated at an average elevation of 750 m. Bikop is malaria hotspot with a high  
171 incidence of malaria located 48 KM away from Yaounde with year round intense malaria  
172 transmission. Both Yaoundé and Bikop are holoendemic for malaria however with differing  
173 transmission intensities. This is mainly because unlike Yaounde, Bikop is located in the heart of  
174 the rain forest with a high density of mosquitoes and poorly constructed houses favoring  
175 sustained high malaria transmission. The temperature in both areas is around 23.7°C with similar



176 average annual rain fall of 1643 mm. There also have similar rainy (March to June, September to  
177 November) and dry seasons (December to February, July–August).

### 178 **Study Population**

179 A total of 124 participants were recruited for this study. All participants were adults participants  
180 of the CIRCB AFRODEC cohort 23-25. Participants were constituted in for groups consisting of  
181 dual HIV-malaria infected (HIV+/Mal+), HIV mono-infected (HIV+/Mal-), malaria mono-  
182 infected (HIV-/Mal+) and double negative (HIV-/Mal-) people.

### 183 **Plasma sample collection and Processing**

184 About 4 ml of blood was collected into plastic Vacuum blood spray-coated K2EDTA tubes  
185 called Vacutest (Vacutestkirma, Italy). Subsequently, samples were transported to the  
186 Vaccinology laboratory of Chantal BIYA International Reference Centre (CIRCB) for storage  
187 and analysis. All samples were stored at room temperature and processed within 4 hours of  
188 collection. To obtain plasma, samples were centrifuged at 2,000 rpm for 10 min at 4°C. The  
189 plasma fraction was harvested sterile under the hood, aliquoted in small single-use volumes and  
190 stored at -20°C until use. The plasma obtained from participants was heat inactivated for 30  
191 minutes at 56°C prior to ELISA assay.

### 192 **HIV infection and CD4 T cell Enumeration**

193 Confirmation of HIV status was done as described for the CIRCB AFRODEC cohort using the  
194 Cameroon’s national algorithm for the diagnosis of HIV infection as previously reported for the  
195 CIRCB AFRODEC cohort (31)

196 Absolute numbers of helper CD4+ T cells for HIV+ participants were determined in fresh  
197 whole blood using BD multitest CD3/CD8/CD45/CD4 and TruCount tubes (BD biosciences,  
198 USA) according to the manufacturer’s instructions.

199 **Malaria Diagnosis and microscopy**

200 A malaria rapid diagnostic test was done on the blood samples according to the manufacturer's  
201 instructions (SD Bioline, USA). In addition, thick peripheral blood films were stained with  
202 Giemsa and examined using a microscope following standard quality-controlled procedures, for  
203 the presence of malaria parasites.

204 **Study antigens**

205 The antigens consisted of recombinant Q $\beta$  displaying Plasmodium falciparum 3D7 strain  
206 sequence derived C-terminal part of MSP3 (Q $\beta$ MSP3) and UB05 (Q $\beta$ UB05) generated in our  
207 group as previously described (14, 15).

208 **Determination of IgG and IgG subclasses antibody responses specific to Q $\beta$ UB05 and**  
209 **Q $\beta$ MSP3**

210 The plasma levels of antibodies specific to the malaria antigens Q $\beta$ UB05 and Q $\beta$ MSP3 were  
211 determined through ELISA assay. Briefly high binding ELISA plates were coated with  
212  $10^7$  particles/well of each recombinant phage and incubated overnight at 4°C. The following day,  
213 Plates were washed 3x with PBST (PBS containing 0.05% Tween 20) and blocked with 3% BSA  
214 in PBS for one hour at 37 °C. Heat inactivated plasma samples were diluted in PBS at 1:300 (for  
215 IgG detection) or 1:100 (for IgG subclasses detection), then 100  $\mu$ l/well added in triplicate and  
216 incubated for two hours at 37 °C. The plates were washed four times with PBST after which the  
217 bound antibody was probed with the peroxidase-conjugated mouse anti-human IgG and IgG  
218 subclasses (IgG1, IgG2, IgG3 and IgG4) diluted 1:4000 in 1X PBS. Bound conjugate was  
219 detected using ABTS substrate and stop solution according to the manufacturer's protocol  
220 (southern biotech, Birmingham USA). The colorimetric signal was measured at 405 nm using a  
221 multiscan FC microplate reader (Thermo Fisher Scientific, USA).

## 222 **Statistical analysis**

223 Data analysis was performed with Graphpad Prism Software version 6.1. The data were  
224 expressed as median (25th percentile-75th percentile). Comparisons of medians among two  
225 groups were performed by the U-Mann-Whitney test. Statistical significance was confirmed  
226 when  $P < 0.05$ .

## 227 **Results**

### 228 **High malaria transmission intensity is associated with superior Q $\beta$ MSP3 and Q $\beta$ UB05** 229 **specific IgG antibodies**

230 Individuals in areas of high perennial malaria transmission intensity developed significantly  
231 higher ( $P=0.0001$ ) levels of Q $\beta$ MSP3 and Q $\beta$ UB05 specific IgG responses than those living in  
232 low transmission zones (compare Fig 1A with B). In high malaria transmission regions Q $\beta$ MSP-  
233 3 specific IgG responses were comparatively higher but not significantly different than responses  
234 specific to Q $\beta$ UB05 in both positive ( $P=0.09$ ) and negative ( $P=0.08$ ) individuals (Fig. S1). In  
235 addition no significant difference is observed in dual HIV-Malaria infected people in their  
236 plasma reactivity with the two recombinant antigens both in low and high transmission areas (Fig  
237 1A&C). Similarly when people negative for both malaria and HIV (double negative individuals)  
238 were considered no significant difference is observed in the IgG responses specific to the two  
239 malaria vaccine antigens. The effect of HIV-1 infection was a significant reduction in IgG  
240 responses specific to the two antigens in both low ( $P=0.0001$  for Q $\beta$ MSP3,  $P=0.04$  for Q $\beta$ UB05)  
241 and high ( $P=0.0001$  for Q $\beta$ MSP3) malaria transmission areas. Surprisingly, there was no  
242 difference in these values for UB05 in the high malaria transmission region (Fig. 1 C&D).  
243 On the other hand, the overall effect of *Plasmodium falciparum* infection in both low and high  
244 malaria transmission regions was a significant increase in IgG responses specific to both antigens

245 irrespective of dual HIV-malaria infection (Fig. 1E&F). Thus whereas HIV infection resulted to  
246 a significant a reduction in antigen specific IgG antibody levels *Plasmodium falciparum*  
247 infection resulted into a significant increase in the IgG antibody levels.

248 **IgG1 subclass response in relation to Dual HIV-malaria infection and the intensity of**  
249 **malaria transmission**

250 Whereas double negative individuals in low malaria transmission areas showed significantly  
251 higher (P=0.0001) IgG1 responses specific to Q $\beta$ MSP3 than to Q $\beta$ UB05; in high malaria  
252 transmission areas the converse was true (Fig. 2B) with IgG1 responses specific to Q $\beta$ UB05  
253 being superior (P=0.0001). The effect of dual HIV-malaria infection in low transmission area  
254 was a significant reduction in the Q $\beta$ MSP3 specific IgG1 responses (P=0.0001) in contrast to  
255 individuals living in high malaria transmission areas where Q $\beta$ MSP3 specific IgG1 responses  
256 were similar to those of the double negative participants. On the other hand IgG1 responses  
257 specific to Q $\beta$ UB05 in high transmission areas remain comparatively higher than those to  
258 Q $\beta$ MSP3 in both dual HIV-malaria positive (P=0.004) and double negative (P=0.0001)  
259 individuals (Fig. 2A&B). This probably indicates the relevance of Q $\beta$ UB05 specific IgG1 in  
260 predicting malaria immunity in high transmission areas even under the challenging  
261 circumstances of HIV infection. The impact of dual HIV-malaria infection in low transmission  
262 areas was therefore a significant reduction (P=0.0001) in IgG1 responses specific to Q $\beta$ MSP3  
263 (Fig 1C) in contrast to Q $\beta$ UB05 where IgG1 responses in this group remain higher than the  
264 double negative participants (P=0.0001). Again in a high transmission area the IgG1 responses to  
265 the two antigens were comparatively higher than values for the low transmission area. In  
266 addition IgG1 responses to Q $\beta$ UB05 in double negative individuals were also significantly  
267 higher (P=0.004) than dual HIV-malaria infected people. Thus in addition to malaria

268 transmission intensity differences in IgG1 subclass antibody levels might also be dependent upon  
269 co-infection with HIV-1 and the antigen of choice.

270 Thus in a low malaria transmission area, significantly high IgG1 responses specific to Q $\beta$ MSP3  
271 is associated with resistance to malaria in contrast to superior Q $\beta$ UB05 specific IgG1 antibodies  
272 which were instead relevant to protection in high a transmission area.

273 **IgG2 subclass response in relation to Dual HIV-malaria infection and the intensity of**  
274 **malaria transmission**

275 In low malaria transmission areas significantly higher IgG2 subclass responses (P=0.0001 for  
276 Q $\beta$ MSP3 and P=0.0001 for Q $\beta$ UB05) were observed in double negative individuals relative to  
277 dual HIV-malaria positive participants (Fig. 3A&B). The converse was the case for high malaria  
278 transmission areas where dual HIV-malaria infection resulted to significantly higher IgG2  
279 responses to both Q $\beta$ MSP3 (P=0.0001) and Q $\beta$ UB05 (P=0.0001). Overall the IgG2 responses  
280 specific to both antigen was comparatively superior in low relative to high transmission areas  
281 (Fig. 3A&B). The effect of an infection with HIV was a general increase in IgG2 responses  
282 specific to both antigens in low and high transmission areas (Fig. 3A&B). Several studies from  
283 other endemic areas of Africa have indicated that high circulating levels of malaria parasite  
284 antigen specific IgG2 could be a marker of severity of malaria infection (32-34). Except for  
285 MSP3 specific IgG2 an infection with plasmodium falciparum was associated with an increased  
286 in IgG2 responses to both antigens in all transmission areas. In a low malaria transmission area  
287 the impact of dual HIV-malaria infection was therefore a significant reduction in IgG2 responses  
288 to both antigens. In contrast in a high malaria transmission area dual HIV-malaria infection  
289 resulted to superior IgG2 responses to both Q $\beta$ MSP3 (P=0.0001) and Q $\beta$ UB05 (p=0.0001)

290 relative to the double negative participants. Thus with respect to both antigens there is a  
291 differential IgG2 response between high and low malaria transmission areas.

292 **IgG3 subclass response in relation to Dual HIV-malaria infection and the intensity of**  
293 **malaria transmission**

294 In low malaria transmission areas the IgG3 subclass antibody responses were significantly higher  
295 in double negative ( $p=0.0001$  for Q $\beta$ MSP3 and  $p=0.0001$  for Q $\beta$ UB05) compared to dual HIV-  
296 malaria infected participants. On the other hand in high malaria transmission areas no difference  
297 is observed between dual HIV-malaria infected and double negative individuals with respect to  
298 IgG3 subclass responses to both antigens. The effect of HIV infection was a significant reduction  
299 of IgG3 responses specific to Q $\beta$ MSP3 in both low ( $p=0.0003$ ) and high ( $p=0.0001$ ) malaria  
300 transmission areas. Similarly IgG3 specific responses to Q $\beta$ UB05 were significantly reduced in  
301 low ( $P=0.01$ ) and high ( $P=0.0001$ ) transmission areas after HIV infection. In low transmission  
302 areas *Plasmodium falciparum* infection resulted to a significant increase in IgG3 responses  
303 specific to both Q $\beta$ MSP3 ( $P=0.0003$ ) and Q $\beta$ UB05 ( $P=0.0004$ ) respectively. In contrast in high  
304 malaria transmission we observed significantly lower IgG3 responses specific to Q $\beta$ MSP3  
305 ( $P=0.0001$ ) and Q $\beta$ UB05 ( $P=0.0001$ ) after *Plasmodium falciparum* infection. Thus there is  
306 differential effect of HIV and *Plasmodium falciparum* infections on IgG3 specific responses to  
307 both antigens which was also associated with the malaria transmission intensity.

308 **IgG4 subclass response in relation to Dual HIV-malaria infection and the intensity of**  
309 **malaria transmission**

310 There was a differential expression of antigen specific IgG4 subclass responses between low and  
311 high malaria transmission areas (Fig. 5A&B). Overall for both antigens in low compared to high  
312 transmission areas dual HIV-malaria positive and double negative individuals showed

313 significantly higher IgG4 responses. However in low transmission areas whereas Q $\beta$ MSP3  
314 specific IgG4 responses in dual HIV-malaria infected individuals were superior to those of  
315 double negative individual (P=0.0001); for Q $\beta$ UB05 IgG4 responses the converse was true. On  
316 the other hand in high transmission areas no difference was observed between dual HIV-malaria  
317 infected and double negative individuals with respect to antigen specific IgG4 responses. The  
318 effect of HIV infection in all the malaria transmission areas was a significant reduction in IgG4  
319 responses specific to both antigens (Fig.5 C&D). *Plasmodium falciparum* infection in low  
320 transmission areas resulted to a significant increase in IgG4 responses specific to Q $\beta$ MSP3  
321 (P=0.0001) and Q $\beta$ UB05 (P=0.0001) respectively (Fig.5E&F). In contrast in high transmission  
322 areas the converse is true as IgG4 responses specific to both Q $\beta$ MSP3 (P=0.0001) and Q $\beta$ UB05  
323 (P=0.0001) decreased significantly after *Plasmodium falciparum* infection (compare Fig. 5E with  
324 F). Thus variation in IgG4 specific responses was dependent upon several factors including  
325 transmission intensity, malaria parasite antigen, HIV infection, *Plasmodium falciparum* infection  
326 and dual HIV-malaria infection.

## 327 **Discussion**

328 In this population based cross sectional study we profiled IgG and IgG subclass immune  
329 responses to Q $\beta$ UB05 and Q $\beta$ MSP3 in dual HIV-malaria infected people living in two areas of  
330 Cameroon differing in malaria transmission intensity. MSP3 and UB05 are asexual blood stage  
331 antigens known to be associated with naturally acquired immunity in individuals living in  
332 malaria endemic regions (18, 21, 23). However in populations living in malaria endemic regions  
333 parasite prevalence rate differ significantly between areas of low and high transmission (35).  
334 Since naturally acquired immunity to malaria is dependent upon the cumulative exposure in  
335 endemic regions low malaria transmission could limit exposure to parasites which has been

336 linked to a waning antimalarial immunity and an increase in clinical episodes of malaria in adults  
337 (36-38). This in effect can modulate the profiles of target antigen specific IgG and IgG subclass  
338 responses that can be achieved especially when the individuals are co-infected with HIV which  
339 depletes the immune system. The impact of a high malaria transmission intensity in both dual  
340 HIV-malaria infected and double negative individuals was a significant increase in antigen  
341 specific IgG irrespective of the targeted antigen type. This might be in line with previous reports  
342 suggesting that high levels of antibodies to several blood stage antigens (4-7, 36) were a  
343 necessary component of protective immunity to malaria. Whereas this is probably correct for  
344 IgG antibody levels specific to Q $\beta$ UB05 and Q $\beta$ MSP3 in high malaria transmission areas the  
345 comparatively lower antibody levels in low transmission areas indicates that partial immunity to  
346 malaria could be waning in these areas due to a reduction in parasite antigen challenge (39)  
347 HIV infection resulted to a significant reduction in IgG antibody responses specific to Q $\beta$ MSP3  
348 in both low (P=0.0001) and high (P=0.0001) malaria transmission areas. In contrast, IgG  
349 antibody responses specific to Q $\beta$ UB05 were not significantly affected by HIV infection  
350 (compares S1A&B). Infection with *Plasmodium falciparum* was associated with a significant  
351 increase in IgG antibodies specific for both antigens in the two transmission areas. This is  
352 especially true when dual HIV-malaria infected individuals are compared with participants  
353 infected with HIV alone. Here we demonstrated that even when there was HIV infection the  
354 impact of *Plasmodium falciparum* infection was a significant increase in IgG antibodies specific  
355 to MSP3 in both low (P=0.0001) and high (P=0.0001) malaria transmission areas (S1E&F). This  
356 indicates that asexual blood stage antigens are capable of modulating parasite antigen specific  
357 IgG antibody levels in both low and high malaria transmission areas. Such antibody levels are  
358 influenced by other factors including malaria and HIV infection.



359 When responses are examined qualitatively with respect to IgG subclasses and dual HIV-malaria  
360 infections differential outcomes are observed. In comparing IgG1 responses to the two antigens  
361 Q $\beta$ MSP3 specific IgG1 was associated with protection against malaria in low transmission areas  
362 in contrast to Q $\beta$ UB05 specific IgG1 responses which were relevant to protection in high malaria  
363 transmission areas. In this regards IgG1 responses specific to Q $\beta$ UB05 in high malaria  
364 transmission areas were significantly higher than responses to Q $\beta$ MSP3 both for dual HIV-  
365 malaria infected (P=0.004) and double negative (P=0.0001) individuals. This is probably in line  
366 with previous reports which associated increase UB05 specific antibody responses with recovery  
367 from clinical malaria (18). Similarly significantly higher IgG2 and IgG3 responses specific to  
368 both antigens were associated with protection in low transmission areas. This is in line with  
369 previous findings indicating that high levels of malaria parasite antigen specific IgG3 and IgG2  
370 were relevant to protection against all forms of malaria (23, 40). This probably indicates that in  
371 malaria endemic regions novel recombinant phages such as Q $\beta$ UB05 could be more useful for  
372 detecting protective levels of antibodies implicated in the control of malaria in both low and high  
373 transmission areas. On the other hand the recombinant phage Q $\beta$ MSP3 would be more relevant  
374 for profiling IgG subclass responses in low malaria transmission areas.

375 The effect of dual HIV-malaria infection was a significant reduction in Q $\beta$ MSP3 specific IgG1  
376 (P=0.0001), IgG2 (P=0.0001) and IgG3 (P=0.04) responses in low transmission areas. In low  
377 transmission areas this significant reduction of Q $\beta$ MSP3 specific IgG2 together with the  
378 cytophilic antibodies IgG1 and IgG3 in dual HIV-malaria infected people could diminish  
379 protection from *Plasmodium falciparum* infection and symptomatic illness. In the case of IgG  
380 subclass antibodies specific to Q $\beta$ UB05 such a reduction in dual HIV-malaria infected people  
381 might lead to increase morbidity and mortality to malaria in both low and high transmission

382 areas. This is mainly because parasite antigen specific IgG1 and IgG3 are critical in monocyte  
383 mediated antibody-dependent cellular inhibition (ADCI) of *Plasmodium falciparum* which is  
384 responsible for killing asexual blood stages. Other reports have also shown that dual HIV-  
385 malaria infections escalate episodes of symptomatic malaria (41) or severe disease in both  
386 children and adults (42, 43). In endemic regions such individuals due to persistent parasitaemia  
387 could serve as reservoirs of malaria parasite thereby sustaining infection in both low and high  
388 transmission areas.

389 In low transmission areas dual HIV-malaria infection resulted to significantly higher Q $\beta$ MSP3  
390 specific IgG4 responses which are probably the reason why IgG1 and IgG3 responses to  
391 Q $\beta$ MSP3 were significantly lower in this group. On the other hand, IgG4 responses to Q $\beta$ UB05  
392 were significantly higher in double negative participants relative to dual HIV-malaria infected  
393 individuals. In high transmission areas IgG4 responses to both antigens were low which could  
394 explain why IgG antibody responses were comparatively high in this area. Since IgG4 is a  
395 noncytotoxic IgG subclass which may block antibody mediated natural immunity to malaria (23,  
396 32, 44-46) high IgG4 levels tended to be associated with lower IgG1 or IgG3 antibody levels.  
397 Overall the antibody responses to both antigens are relatively heterogeneous being certainly  
398 influenced by a number of factors including transmission area, ongoing *plasmodium falciparum*  
399 infection and coinfection with HIV. Never the less there was a clear indication that MSP3  
400 specific IgG subclass responses were associated with protective immunity to malaria mainly in  
401 low transmission areas whilst similar responses to Q $\beta$ UB05 were related to protection in both  
402 low and high malaria transmission areas. This implies that Q $\beta$ MSP3 might not be suitable as a  
403 standalone vaccine in areas differing in transmission intensity. On the other hand antigenicity of  
404 UB05 most likely predicts immunity in both low and high transmission areas and could be used

405 either alone or in combination with other antigens for vaccine studies in areas differing in  
406 transmission intensities. Thus understanding immune responses to Q $\beta$ UB05 and Q $\beta$ MSP3 could  
407 enable the development of efficacious vaccines or commensurate immunotherapeutic strategies  
408 suitable for areas differing in malaria transmission intensity.

#### 409 **Acknowledgement**

410 The authors are grateful to Professor Alain B Waffo for providing the recombinant Q $\beta$ MSP3  
411 and Q $\beta$ UB05 phages. We would like to thank the personnel of various techniques of  
412 CIRCB, Centre de Santé Catholique de Bikop and Mvogbesi Yaounde for their help in  
413 collecting the blood samples. Most importantly our gratitude goes to members of the CIRCB  
414 AFRODEC cohort for consenting to participate in this project.

#### 415 **Funding**

416 This project was funded by grants from CIRCB, EDCTP (grant #TA.2010.40200.016)  
417 TWAS(#12059RG/bio/af/ac\_G) and Canada grand challenge (#0121-01); to Godwin W  
418 Nchinda; from Korea-Africa cooperation grant (NRF-2013K1A3A1A09076155) from the  
419 National Research Foundation of Korea funded by the Ministry of Science, ICT and Future  
420 Planning in the Republic of Korea to Chae Gyu Park; and then from the Center for  
421 NanoBiotechnology Research (CNBR) of ASU for grant # NSF-CREST (HRD-241701)  
422 and grant # NSF-AGEP (1432991 BKR) of National Science Foundation to Alain Bopda  
423 Waffo. This project was also largely funded by the Cameroonian government through CIRCB.

424

425

## 426 **References**

- 427 1. Doolan DL, Dobano C, Baird JK. 2009. Acquired immunity to malaria. *Clinical*  
428 *microbiology reviews*, 22(1): 13-36, Table of Contents.
- 429 2. Chan JA, Howell KB, Reiling L, Ataide R, Mackintosh CL, Fowkes FJ, Petter M,  
430 Chesson JM, Langer C, Warimwe GM, Duffy MF, Rogerson SJ, Bull PC, Cowman AF,  
431 Marsh K, Beeson JG. 2012. Targets of antibodies against *Plasmodium falciparum*-  
432 infected erythrocytes in malaria immunity. *The Journal of clinical investigation*, 122(9):  
433 3227-3238.
- 434 3. Fowkes FJ, Richards JS, Simpson JA, Beeson JG. 2010. The relationship between anti-  
435 merozoite antibodies and incidence of *Plasmodium falciparum* malaria: A systematic  
436 review and meta-analysis. *PLoS medicine*, 7(1): e1000218.
- 437 4. Richards JS, Staniscic DI, Fowkes FJ, Tavul L, Dabod E, Thompson JK, Kumar S, Chitnis  
438 CE, Narum DL, Michon P, Siba PM, Cowman AF, Mueller I, Beeson JG. 2010.  
439 Association between naturally acquired antibodies to erythrocyte-binding antigens of  
440 *Plasmodium falciparum* and protection from malaria and high-density parasitemia.  
441 *Clinical infectious diseases : an official publication of the Infectious Diseases Society of*  
442 *America*, 51(8): e50-60.
- 443 5. McCarra MB, Ayodo G, Sumba PO, Kazura JW, Moormann AM, Narum DL, John CC.  
444 2011. Antibodies to *Plasmodium falciparum* erythrocyte-binding antigen-175 are  
445 associated with protection from clinical malaria. *The Pediatric infectious disease journal*,  
446 30(12): 1037-1042.
- 447 6. Daou M, Kouriba B, Ouedraogo N, Diarra I, Arama C, Keita Y, Sissoko S, Ouologuem  
448 B, Arama S, Bousema T, Doumbo OK, Sauerwein RW, Scholzen A. 2015. Protection of

- 449 Malian children from clinical malaria is associated with recognition of multiple antigens.  
450 Malaria journal, 14: 56.
- 451 7. Trieu A, Kayala MA, Burk C, Molina DM, Freilich DA, Richie TL, Baldi P, Felgner PL,  
452 Doolan DL. 2011. Sterile protective immunity to malaria is associated with a panel of  
453 novel *P. falciparum* antigens. *Molecular and cellular proteomics : MCP*, 10(9): M111  
454 007948.
- 455 8. Gray JC, Corran PH, Mangia E, Gaunt MW, Li Q, Tetteh KK, Polley SD, Conway DJ,  
456 Holder AA, Bacarese-Hamilton T, Riley EM, Crisanti A. 2007. Profiling the antibody  
457 immune response against blood stage malaria vaccine candidates. *Clinical chemistry*,  
458 53(7): 1244-1253.
- 459 9. Dent AE, Nakajima R, Liang L, Baum E, Moormann AM, Sumba PO, Vulule J,  
460 Babineau D, Randall A, Davies DH, Felgner PL, Kazura JW. 2015. Plasmodium  
461 falciparum Protein Microarray Antibody Profiles Correlate With Protection From  
462 Symptomatic Malaria in Kenya. *The Journal of infectious diseases*, 212(9): 1429-1438.
- 463 10. Bai T, Becker M, Gupta A, Strike P, Murphy VJ, Anders RF, Batchelor AH. 2005.  
464 Structure of AMA1 from Plasmodium falciparum reveals a clustering of polymorphisms  
465 that surround a conserved hydrophobic pocket. *Proceedings of the National Academy of  
466 Sciences of the United States of America*, 102(36): 12736-12741.
- 467 11. Hodder AN, Crewther PE, Anders RF. 2001. Specificity of the protective antibody  
468 response to apical membrane antigen 1. *Infection and immunity*, 69(5): 3286-3294.
- 469 12. Miura K, Zhou H, Muratova OV, Orcutt AC, Giersing B, Miller LH, Long CA. 2007. In  
470 immunization with Plasmodium falciparum apical membrane antigen 1, the specificity of

- 471 antibodies depends on the species immunized. *Infection and immunity*, 75(12): 5827-  
472 5836.
- 473 13. Jones TR, Obaldia N, 3rd, Gramzinski RA, Hoffman SL. 2000. Repeated infection of  
474 Aotus monkeys with *Plasmodium falciparum* induces protection against subsequent  
475 challenge with homologous and heterologous strains of parasite. *The American journal of*  
476 *tropical medicine and hygiene*, 62(6): 675-680.
- 477 14. Skamel C, Aller SG, Bopda Waffo A. 2014. In vitro evolution and affinity-maturation  
478 with Coliphage qbeta display. *PloS one*, 9(11): e113069.
- 479 15. Waffo AB, Ngu LN, Singleton RL, Egbo T, Simo JL, Sanders CA, Ambada GE, Nji NN,  
480 Ngoh AA, Matthews QL, Robertson BK, Tchouangueu TF, Lissom A, Bawage S,  
481 Tchadji C, Okoli AS, Esimone CO, Chukwuanukwu R, Mbacham W, Kaptue L, Nchinda  
482 GW. 2017. Surface Engineering of Recombinant RNA Coliphage Q $\beta$  to Display gp41  
483 MembraneProximal External-Region Epitopes from HIV-1. *J Clin Exp Immunol*, 2(1): 1-  
484 15.
- 485 16. Singh S, Soe S, Mejia JP, Roussilhon C, Theisen M, Corradin G, Druilhe P. 2004.  
486 Identification of a conserved region of *Plasmodium falciparum* MSP3 targeted by  
487 biologically active antibodies to improve vaccine design. *The Journal of infectious*  
488 *diseases*, 190(5): 1010-1018.
- 489 17. Daher LJ, Demanga CG, Prieur E, Perignon JL, Bouharoun-Tayoun H, Druilhe P. 2010.  
490 Toward the rational design of a malaria vaccine construct using the MSP3 family as an  
491 example: contribution of immunogenicity studies in models. *Infection and immunity*,  
492 78(1): 477-485.

- 493 18. Titanji VP, Amambua-Ngwa A, Anong DN, Mbandi SK, Tangie E, Tening I, Yengo R.  
494 2009. Isolation and expression of UB05, a Plasmodium falciparum antigen recognised by  
495 antibodies from semi-immune adults in a high transmission endemic area of the  
496 Cameroonian rainforest. *Clinical chemistry and laboratory medicine*, 47(9): 1147-1158.
- 497 19. Jepsen MP, Jogdand PS, Singh SK, Esen M, Christiansen M, Issifou S, Hounkpatin AB,  
498 Ateba-Ngoa U, Kremsner PG, Dziegiel MH, Olesen-Larsen S, Jepsen S, Mordmuller B,  
499 Theisen M. 2013. The malaria vaccine candidate GMZ2 elicits functional antibodies in  
500 individuals from malaria endemic and non-endemic areas. *The Journal of infectious*  
501 *diseases*, 208(3): 479-488.
- 502 20. Bouharoun-Tayoun H, Attanath P, Sabchareon A, Chongsuphajaisiddhi T, Druilhe P.  
503 1990. Antibodies that protect humans against Plasmodium falciparum blood stages do not  
504 on their own inhibit parasite growth and invasion in vitro, but act in cooperation with  
505 monocytes. *The Journal of experimental medicine*, 172(6): 1633-1641.
- 506 21. Oeuvray C, Bouharoun-Tayoun H, Gras-Masse H, Bottius E, Kaidoh T, Aikawa M,  
507 Filgueira MC, Tartar A, Druilhe P. 1994. Merozoite surface protein-3: a malaria protein  
508 inducing antibodies that promote Plasmodium falciparum killing by cooperation with  
509 blood monocytes. *Blood*, 84(5): 1594-1602.
- 510 22. Good MF, Doolan DL. 2010. Malaria vaccine design: immunological considerations.  
511 *Immunity*, 33(4): 555-566.
- 512 23. Roussillon C, Oeuvray C, Muller-Graf C, Tall A, Rogier C, Trape JF, Theisen M, Balde  
513 A, Perignon JL, Druilhe P. 2007. Long-term clinical protection from falciparum malaria  
514 is strongly associated with IgG3 antibodies to merozoite surface protein 3. *PLoS*  
515 *medicine*, 4(11): e320.

- 516 24. Thera MA, Doumbo OK, Coulibaly D, Laurens MB, Ouattara A, Kone AK, Guindo AB,  
517 Traore K, Traore I, Kouriba B, Diallo DA, Diarra I, Daou M, Dolo A, Tolo Y, Sissoko  
518 MS, Niangaly A, Sissoko M, Takala-Harrison S, Lyke KE, Wu Y, Blackwelder WC,  
519 Godeaux O, Vekemans J, Dubois MC, Ballou WR, Cohen J, Thompson D, Dube T,  
520 Soisson L, Diggs CL, House B, Lanar DE, Dutta S, Heppner DG, Jr., Plowe CV. 2011. A  
521 field trial to assess a blood-stage malaria vaccine. *The New England journal of medicine*,  
522 365(11): 1004-1013.
- 523 25. Ouattara A, Laurens MB. 2015. Vaccines against malaria. *Clinical infectious diseases* :  
524 an official publication of the Infectious Diseases Society of America, 60(6): 930-936.
- 525 26. Lusingu JP, Gesase S, Msham S, Francis F, Lemnge M, Seth M, Sembuche S, Rutta A,  
526 Minja D, Segeja MD, Bosomprah S, Cousens S, Noor R, Chilengi R, Druilhe P. 2009.  
527 Satisfactory safety and immunogenicity of MSP3 malaria vaccine candidate in Tanzanian  
528 children aged 12-24 months. *Malaria journal*, 8: 163.
- 529 27. Njunda AL, Njumkeng C, Nsagha SD, Assob JC, Kwenti TE. 2016. The prevalence of  
530 malaria in people living with HIV in Yaounde, Cameroon. *BMC public health*, 16: 964.
- 531 28. Njambe Priso GD, Lissom A, Ngu LN, Nji NN, Tchadji JC, Tchouangueu TF, Ambada  
532 GE, Ngane CSS, Dafeu BL, Djukouo L, Nyebe I, Magagoum S, Ngoh AA, Herve OF,  
533 Garcia R, Gutierrez A, Okoli AS, Esimone CO, Njiokou F, Park CG, Waffo AB, Nchinda  
534 GW. 2018. Filaria specific antibody response profiling in plasma from anti-retroviral  
535 naive Loa loa microfilaraemic HIV-1 infected people. *BMC infectious diseases*, 18(1):  
536 160.
- 537 29. Ambada GN, Ntsama CE, Nji NN, Ngu LN, Sake CN, Lissom A, Tchouangueu FT,  
538 Tchadji J, Sosso M, Etoa FX, Nchinda GW. 2017. Phenotypic characterization of



- 539 regulatory T cells from antiretroviral-naive HIV-1-infected people. *Immunology*, 151(4):  
540 405-416.
- 541 30. Sake CS, Ngu L, Ambada G, Chedjou JP, Nji N, Tchadji JC, Lissom A, Tchouangueu  
542 TF, Djukouo L, Njambe G, Garcia R, Gutierrez A, Waffo AB, Park CG, Mbacham W,  
543 Etoa F-X, Nchinda GW. 2017. The Effect of Antiretroviral Naïve HIV-1 Infection on the  
544 Ability of Natural Killer Cells to Produce IFN- $\gamma$  upon Exposure to *Plasmodium*  
545 *falciparum* -Infected Erythrocytes *Biomed Hub*, 2.
- 546 31. Domkam IK, Sonela N, Kamgaing N, Takam PS, Gwom L-C, Michel T, Betilene A,  
547 Fokam J, Billong SC, Moukam LV, Etounou TM, Minka CSM, Ndjolo A. 2018.  
548 Prevalence and risk factors to HIV-infection amongst health care workers within public  
549 and private health facilities in Cameroon. *Pan African Medical Journal*, 29(158).
- 550 32. Aucan C, Traore Y, Tall F, Nacro B, Traore-Leroux T, Fumoux F, & Rihet P. 2000. High  
551 immunoglobulin G2 (IgG2) and low IgG4 levels are associated with human resistance to  
552 *Plasmodium falciparum* malaria. *Infection and immunity*, 68(3): 1252-1258.
- 553 33. Nasr A, Iriemenam NC, Troye-Blomberg M, Giha HA, Balogun HA, Osman OF,  
554 Montgomery SM, ElGhazali G, Berzins K. 2007. Fc gamma receptor IIa (CD32)  
555 polymorphism and antibody responses to asexual blood-stage antigens of *Plasmodium*  
556 *falciparum* malaria in Sudanese patients. *Scandinavian journal of immunology*, 66(1): 87-  
557 96.
- 558 34. Ntoumi F, Ekala MT, Makuwa M, Lekoulou F, Mercereau-Puijalon O, Deloron P. 2002.  
559 Sickle cell trait carriage: imbalanced distribution of IgG subclass antibodies reactive to  
560 *Plasmodium falciparum* family-specific MSP2 peptides in serum samples from Gabonese  
561 children. *Immunology letters*, 84(1): 9-16.

- 562 35. Nkumama IN, O'Meara WP, Osier FHA. 2017. Changes in Malaria Epidemiology in  
563 Africa and New Challenges for Elimination. *Trends in parasitology*, 33(2): 128-140.
- 564 36. Murungi LM, Kamuyu G, Lowe B, Bejon P, Theisen M, Kinyanjui SM, Marsh K, Osier  
565 FH. 2013. A threshold concentration of anti-merozoite antibodies is required for  
566 protection from clinical episodes of malaria. *Vaccine*, 31(37): 3936-3942.
- 567 37. Bouyou-Akotet MK, Offouga CL, Mawili-Mboumba DP, Essola L, Madoungou B,  
568 Kombila M. 2014. Falciparum malaria as an emerging cause of fever in adults living in  
569 Gabon, Central Africa. *BioMed research international*, 2014: 351281.
- 570 38. Kipanga PN, Omondi D, Mireji PO, Sawa P, Masiga DK, Villinger J. 2014. High-  
571 resolution melting analysis reveals low Plasmodium parasitaemia infections among  
572 microscopically negative febrile patients in western Kenya. *Malaria journal*, 13: 429.
- 573 39. Pinkevych M, Petravic J, Chelimo K, Kazura JW, Moormann AM, Davenport MP. 2012.  
574 The dynamics of naturally acquired immunity to Plasmodium falciparum infection. *PLoS*  
575 *computational biology*, 8(10): e1002729.
- 576 40. Giha HA, Nasr A, Iriemenam NC, Balogun HA, Arnot D, Theander TG, Troye-Blomberg  
577 M, Berzins K, ElGhazali G. 2010. Age-dependent association between IgG2 and IgG3  
578 subclasses to Pf332-C231 antigen and protection from malaria, and induction of  
579 protective antibodies by sub-patent malaria infections, in Daraweesh. *Vaccine*, 28(7):  
580 1732-1739.
- 581 41. Kanya MR, Gasasira AF, Yeka A, Bakuyaita N, Nsohya SL, Francis D, Rosenthal PJ,  
582 Dorsey G, Havlir D. 2006. Effect of HIV-1 infection on antimalarial treatment outcomes  
583 in Uganda: a population-based study. *The Journal of infectious diseases*, 193(1): 9-15.

- 584 42. Saracino A, Nacarapa EA, da Costa Massinga EA, Martinelli D, Scacchetti M, de  
585 Oliveira C, Antonich A, Galloni D, Ferro JJ, Macome CA. 2012. Prevalence and clinical  
586 features of HIV and malaria co-infection in hospitalized adults in Beira, Mozambique.  
587 *Malaria journal*, 11: 241.
- 588 43. Tay SC, Badu K, Mensah AA, Gbedema SY. 2015. The prevalence of malaria among  
589 HIV seropositive individuals and the impact of the co- infection on their hemoglobin  
590 levels. *Annals of clinical microbiology and antimicrobials*, 14: 10.
- 591 44. Stanisic DI, Richards JS, McCallum FJ, Michon P, King CL, Schoepflin S, Gilson PR,  
592 Murphy VJ, Anders RF, Mueller I, Beeson JG. 2009. Immunoglobulin G subclass-  
593 specific responses against *Plasmodium falciparum* merozoite antigens are associated with  
594 control of parasitemia and protection from symptomatic illness. *Infection and immunity*,  
595 77(3): 1165-1174.
- 596 45. Mewono L, Matondo Maya DW, Matsiegui PB, Agnandji ST, Kendjo E, Barondi F,  
597 Issifou S, Kremsner PG, Mavoungou E. 2008. Interleukin-21 is associated with IgG1 and  
598 IgG3 antibodies to erythrocyte-binding antigen-175 peptide 4 of *Plasmodium falciparum*  
599 in Gabonese children with acute *falciparum* malaria. *European cytokine network*, 19(1):  
600 30-36.
- 601 46. Bouharoun-Tayoun H, Oeuvray C, Lunel F, Druilhe P. 1995. Mechanisms underlying the  
602 monocyte-mediated antibody-dependent killing of *Plasmodium falciparum* asexual blood  
603 stages. *The Journal of experimental medicine*, 182(2): 409-418.

604

605

606 **Figure Legends**

607 **Figure 1: specific IgG responses to recombinant phages Q $\beta$ MSP3 and Q $\beta$ UB05 with respect**  
608 **to dual HIV-Malaria infections in individuals living in low and high malaria transmission**  
609 **areas**

610 Comparison of IgG antibody responses between dual HIV-malaria infected and double negative  
611 individuals in low and high malaria transmission areas. IgG specific responses to the  
612 recombinant phages Q $\beta$ MSP3 (A) and Q $\beta$ UB05 (B) in low and high transmission areas. Effect  
613 of HIV infection on Q $\beta$ MSP3 (C) and Q $\beta$ UB05 (D) specific IgG responses in the two  
614 transmission areas. IgG responses specific to Q $\beta$ MSP3 (E) and Q $\beta$ UB05 (F) in individuals  
615 positive for *Plasmodium falciparum* in both transmission areas.

616

617 **Figure 2: IgG1 specific response to recombinant phages Q $\beta$ MSP3 and Q $\beta$ UB05 with to**  
618 **dual HIV-Malaria infections in individuals living in low and high malaria transmission**  
619 **areas**

620 Comparison of IgG1 antibody responses between dual HIV-malaria infected and double negative  
621 individuals in low and high malaria transmission areas. IgG1 responses specific to the  
622 recombinant phages Q $\beta$ MSP3 (A) and Q $\beta$ UB05 (B) in low and high transmission areas. Effect  
623 of HIV infection on Q $\beta$ MSP3 (C) and Q $\beta$ UB05 (D) specific IgG1 responses in the two  
624 transmission areas. IgG1 responses specific to Q $\beta$ MSP3 (E) and Q $\beta$ UB05 (F) in individuals  
625 positive for *Plasmodium falciparum* in both transmission areas.

626

627

628 **Figure 3: IgG2 responses specific to the recombinant phages Q $\beta$ MSP3 and Q $\beta$ UB05 with**  
629 **respect to dual HIV-Malaria infection in individuals living in low and high malaria**  
630 **transmission areas**

631 Comparison of IgG2 antibody responses between dual HIV-malaria infected and double negative  
632 individuals in low and high malaria transmission areas. IgG2 responses specific to the  
633 recombinant phages Q $\beta$ MSP3 (A) and Q $\beta$ UB05 (B) in low and high transmission areas. Effect  
634 of HIV infection on Q $\beta$ MSP3 (C) and Q $\beta$ UB05 (D) specific IgG2 responses in the two  
635 transmission areas. IgG2 responses specific to Q $\beta$ MSP3 (E) and Q $\beta$ UB05 (F) in individuals  
636 positive for *Plasmodium falciparum* in both transmission areas.

637 **Figure 4: IgG3 specific response to the recombinant phages Q $\beta$ MSP3 and Q $\beta$ UB05 with**  
638 **respect to dual HIV-Malaria infection in individuals living in low and high malaria**  
639 **transmission areas**

640 Comparison of IgG3 antibody responses between dual HIV-malaria infected and double negative  
641 individuals in low and high malaria transmission areas. IgG3 responses specific to the  
642 recombinant phages Q $\beta$ MSP3 (A) and Q $\beta$ UB05 (B) in low and high transmission areas. Effect  
643 of HIV infection on Q $\beta$ MSP3 (C) and Q $\beta$ UB05 (D) specific IgG3 responses in the two  
644 transmission areas. IgG3 responses specific to Q $\beta$ MSP3 (E) and Q $\beta$ UB05 (F) in individuals  
645 positive for *Plasmodium falciparum* in both transmission areas.

646 **Figure 5: IgG4 response specific to the recombinant phages Q $\beta$ MSP3 and Q $\beta$ UB05 with**  
647 **respect to dual HIV-Malaria infection in individuals living in low and high malaria**  
648 **transmission areas**

649 Comparison of IgG4 antibody responses between dual HIV-malaria infected and double  
650 negative individuals in low and high malaria transmission areas. IgG4 responses specific to the

651 recombinant phages Q $\beta$ MSP3 (A) and Q $\beta$ UB05 (B) in low and high transmission areas. Effect  
 652 of HIV infection on Q $\beta$ MSP3 (C) and Q $\beta$ UB05 (D) specific IgG4 responses in the two  
 653 transmission areas. IgG responses specific to Q $\beta$ MSP3 (E) and Q $\beta$ UB05 (F) in individuals  
 654 positive for *Plasmodium falciparum* in both transmission areas.

655 **Table 1: Study population characteristics**

| Variables                          | HIV-/Mal- (n=62) |                    | HIV-/Mal+ (n= 59) |            | HIV+/Mal- (n= 62)       |               | HIV+/Mal+ (n= 62)         |            |
|------------------------------------|------------------|--------------------|-------------------|------------|-------------------------|---------------|---------------------------|------------|
|                                    | Male             | Female             | Male              | Female     | Male                    | Female        | Male                      | Female     |
| <b>Participants (%)</b>            | 30 (48)          | 32 (52)            | 30 (51)           | 29 (49)    | 44 (71)                 | 18 (29)       | 44 (71)                   | 18 (29)    |
| <b>Median Age (IQR)</b>            | 30 (22- 34.5)    | 35.5 (22.75-48.75) | 32 (23–46.25)     | 29 (26-45) | 46 (36.25-58.25)        | 36 (30-46.25) | 38 (31 - 46)              | 42 (33-52) |
| <b>Median CD4 count (cell/mm3)</b> | N/A              |                    | N/A               |            | 480.6 (IQR : 270.5-635) |               | 459.6 (IQR : 241.0–594.8) |            |

656 **N/A = Not Applicable, IQR = interquartile range, Mal+= malaria positive**

657

658

659

660

661

662

663

664

665 **Figures**

666 **Figure 1**

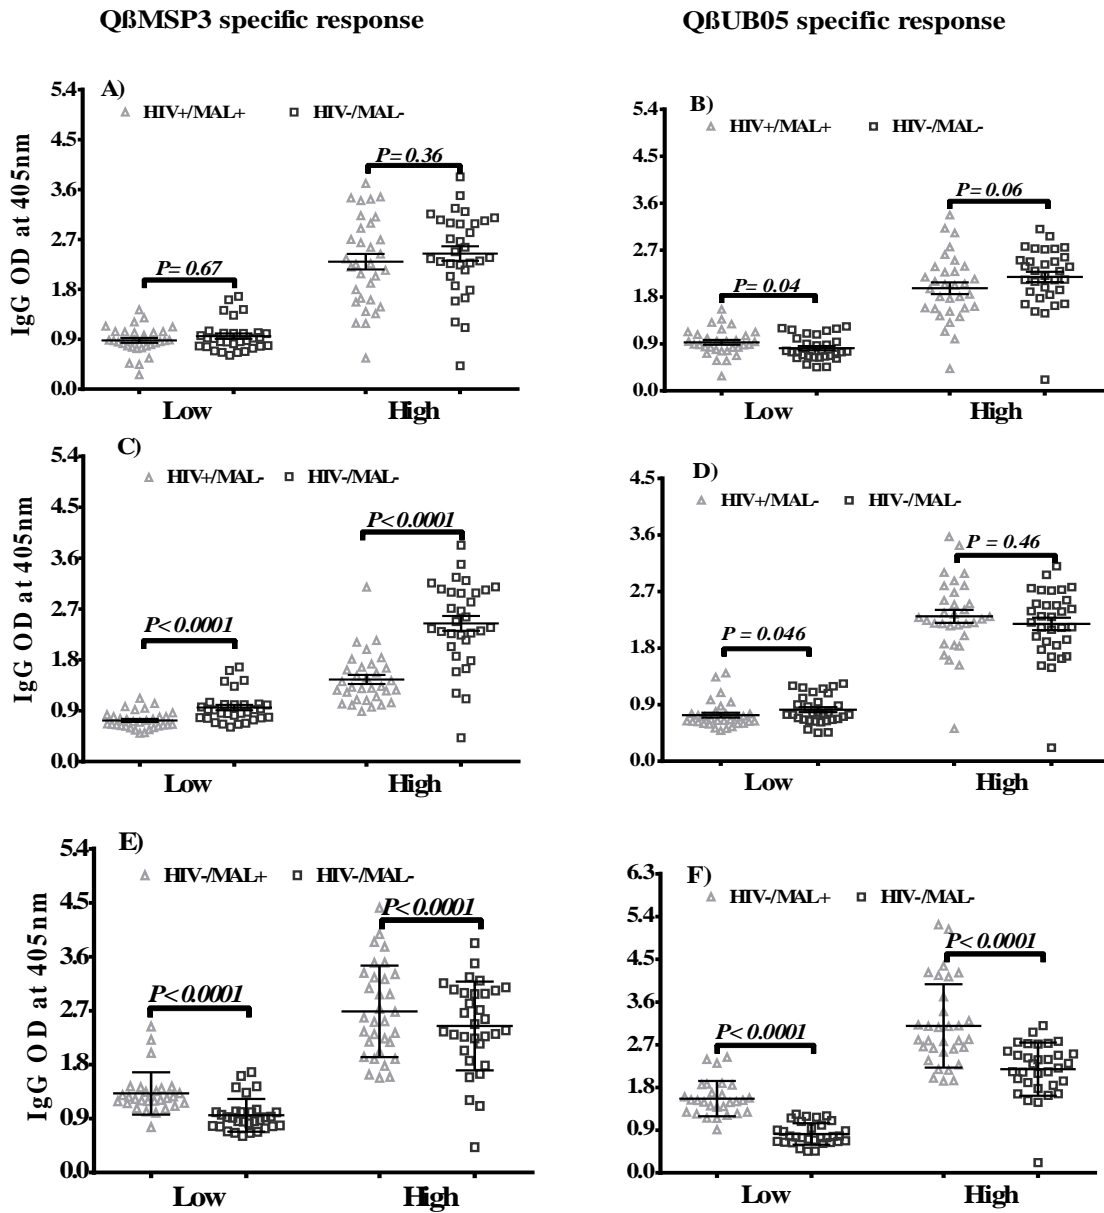

667

668

669

670

671

672 **Figure 2**

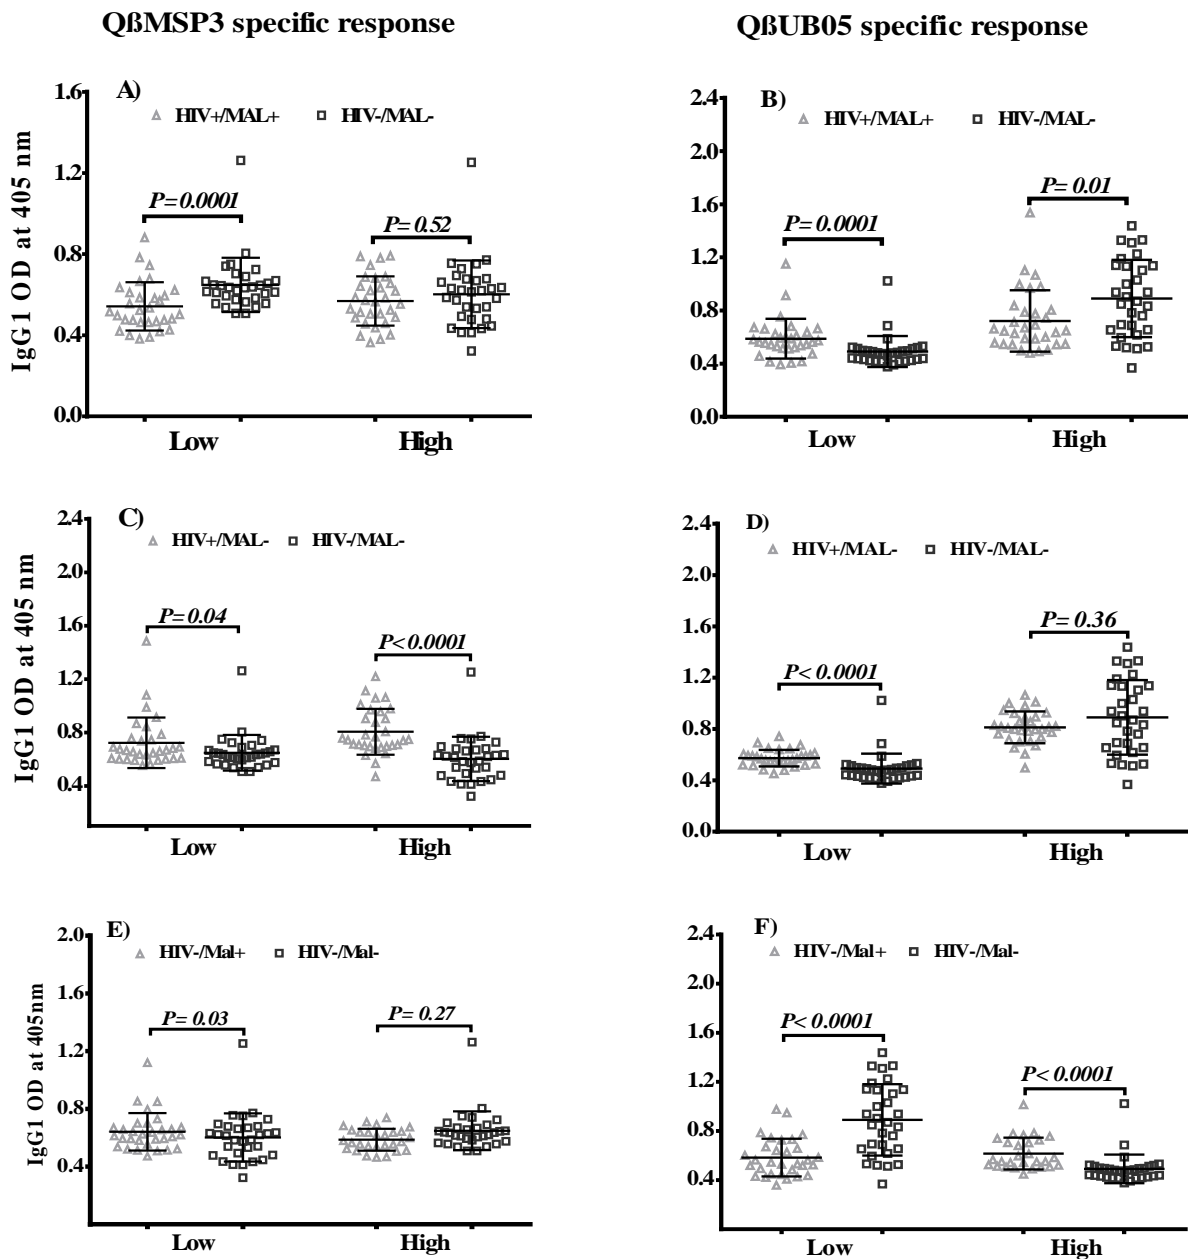

673

674

675

676

677



678

679 **Figure 3**

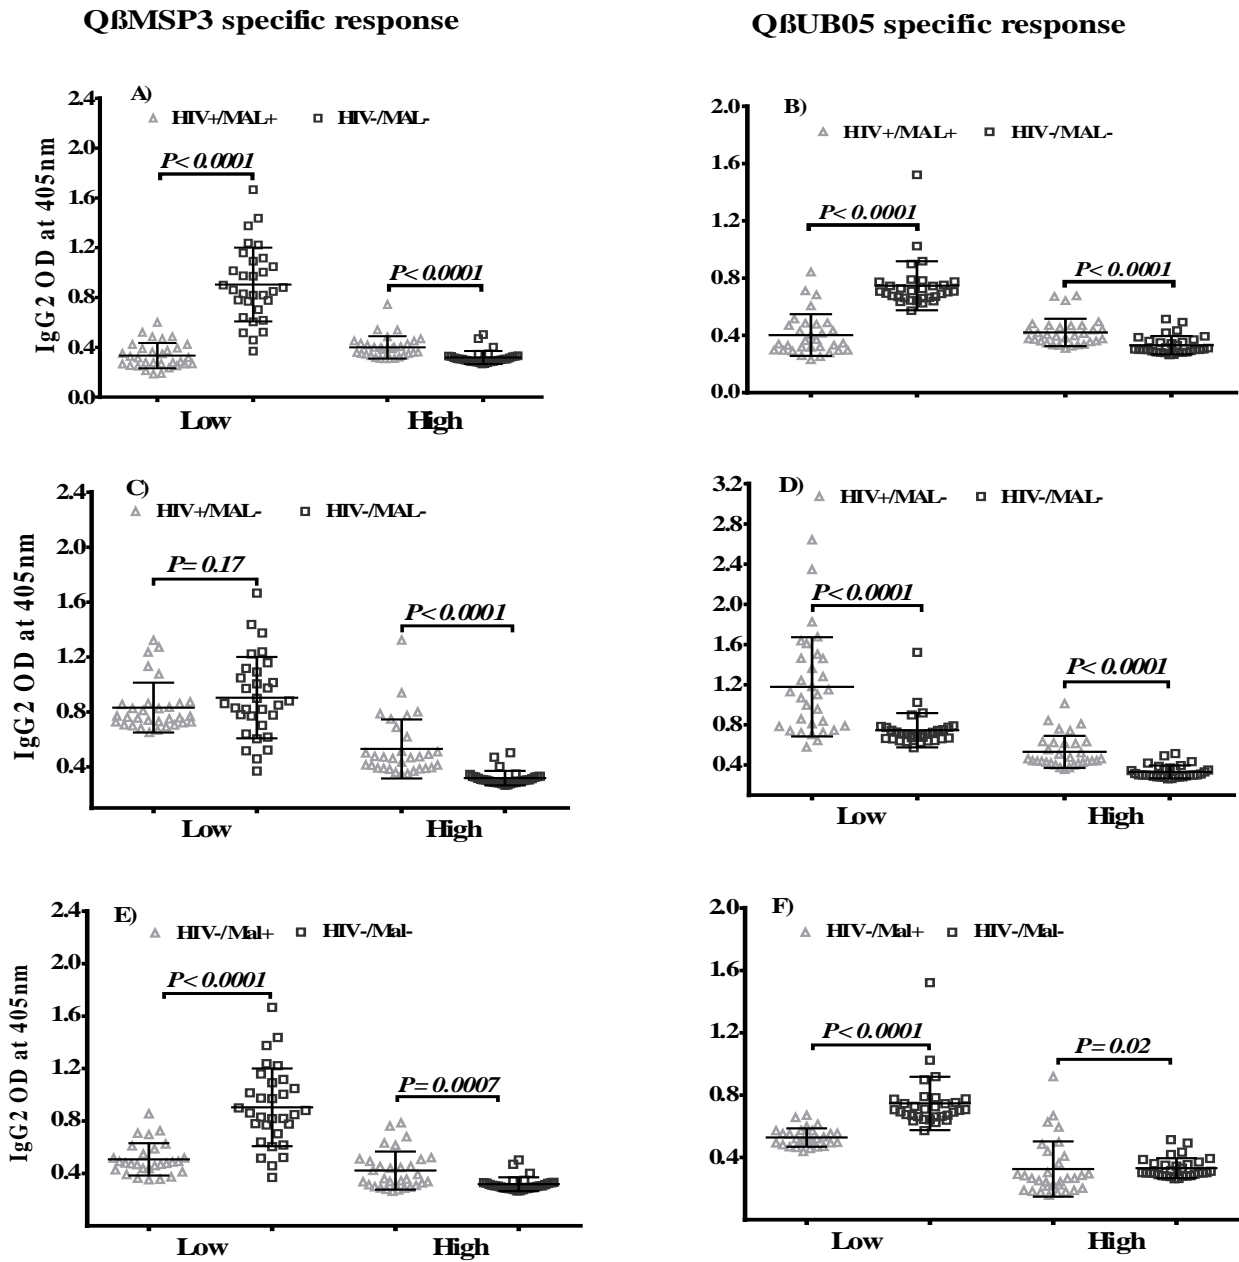

680

681

682

683

684

685

686

687 **Figure 4**

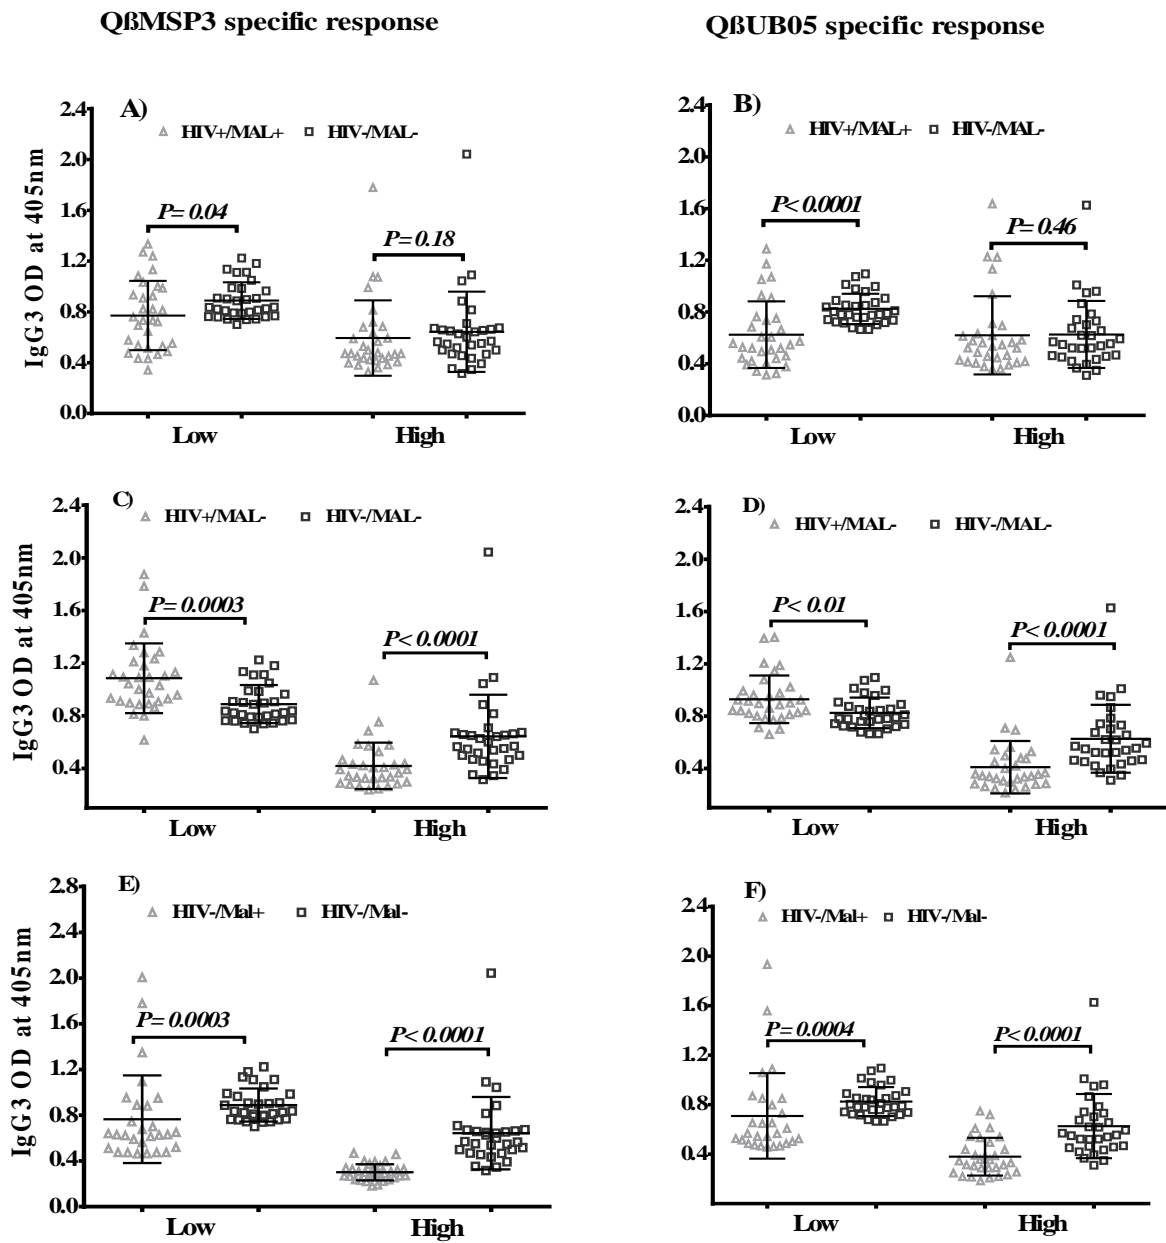

688

689

690

691

692

693

694 **Figure 5**

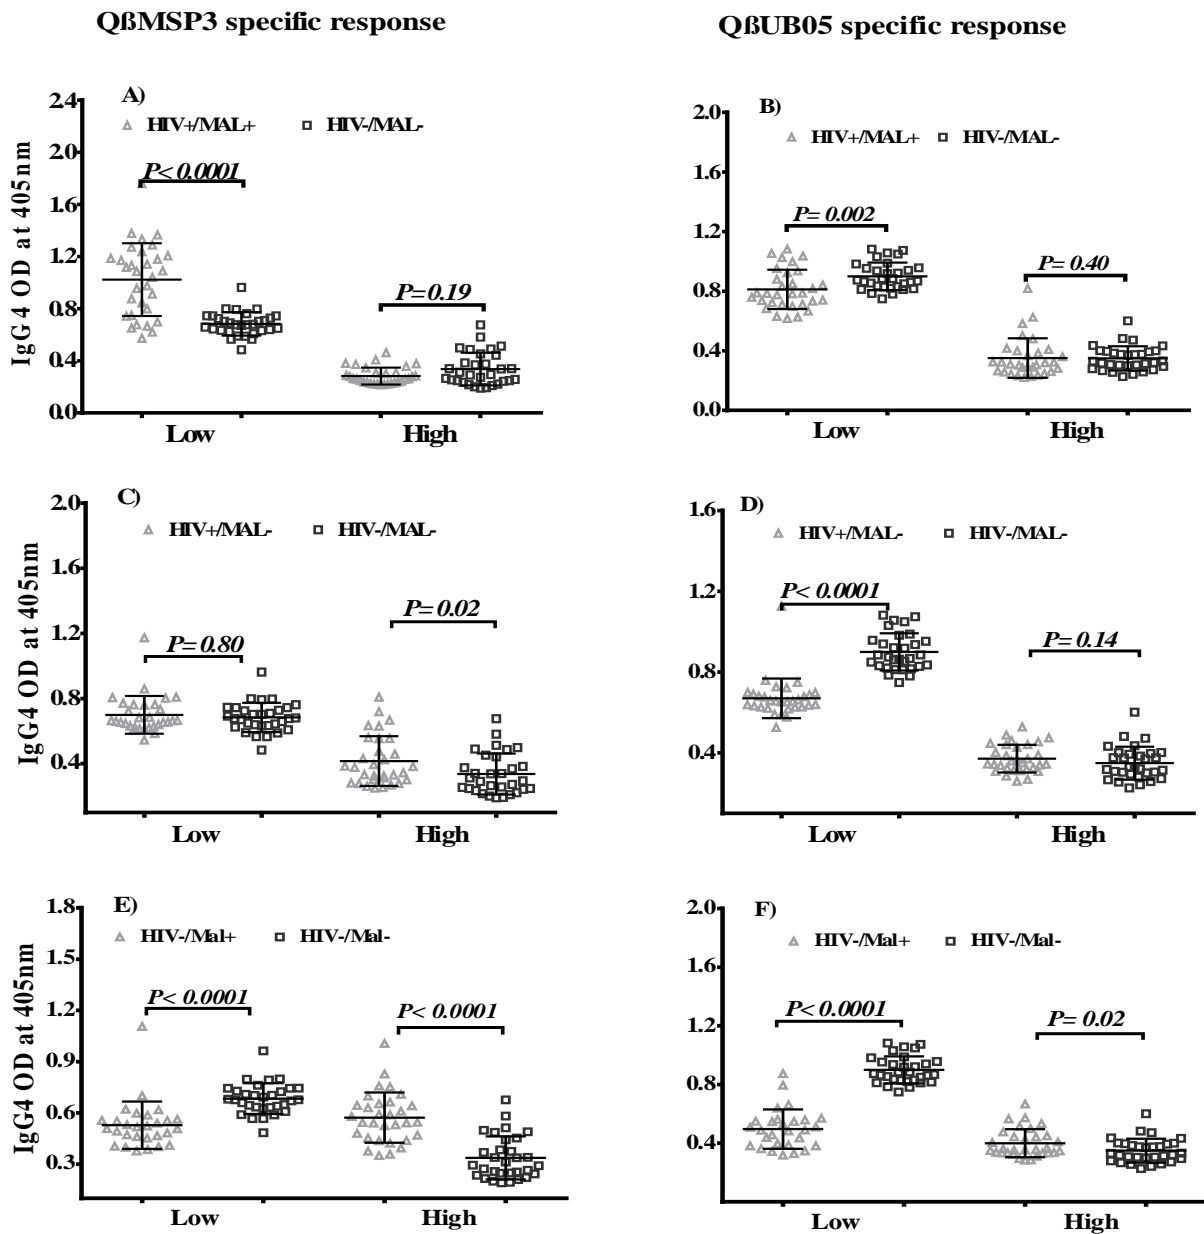

695

696

697

698

699

700
